# Supplementary material for: Constructing Cu defect band within TiO2 and supporting NiOx nanoparticles for efficient CO2 photoreduction
Source: Royal Society of Chemistry journal article supplement (doi:10.1039/d3dt04191c), 2024-01-01
Supplement: d3dt04191c1.pdf [file d3dt04191c1.pdf]

## Supplementary Information

### Constructing Cu defects band within TiO<sub>2</sub> and supporting NiO<sub>x</sub> nanoparticles for efficient CO<sub>2</sub> photoreduction

Jun-ying Tang<sup>a</sup>, Xiao-jing Liu<sup>b,\*</sup>, Rui-tang Guo<sup>b,\*</sup>, Juan Wang, Qing-shan Wang<sup>a</sup>, Wei-guo Pan<sup>b,\*</sup>

<sup>a</sup> School of Energy and Power Engineering, University of Shanghai for Science and Technology, Shanghai, China

<sup>b</sup> College of Energy and Mechanical Engineering, Shanghai University of Electric Power, Shanghai, China

#### Corresponding Author

\* Xiao-jing Liu: [gougou0022504@sina.com](mailto:gougou0022504@sina.com)

\* Rui-tang Guo: [grta@sohu.com](mailto:grta@sohu.com)

\* Wei-guo Pan: [pweiguo@163.com](mailto:pweiguo@163.com)

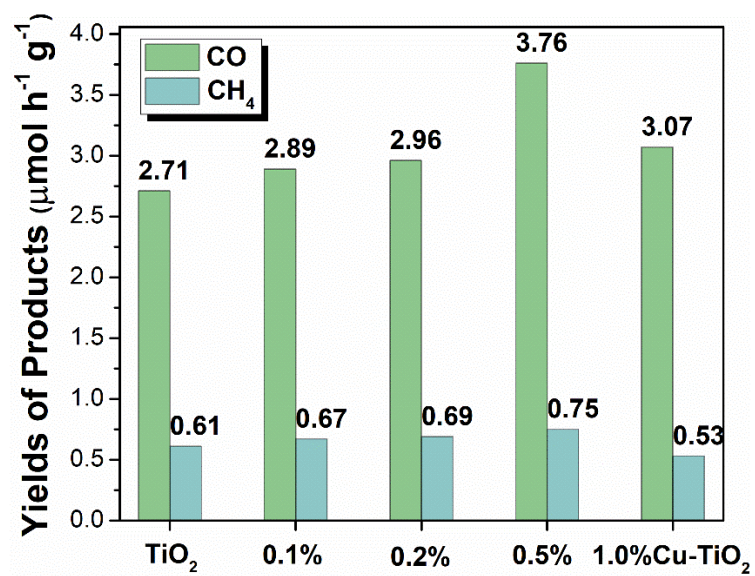

**Fig. S1** Photocatalytic CO<sub>2</sub> reduction performance over Cu-TiO<sub>2</sub> composites with different loading ratios of Cu.

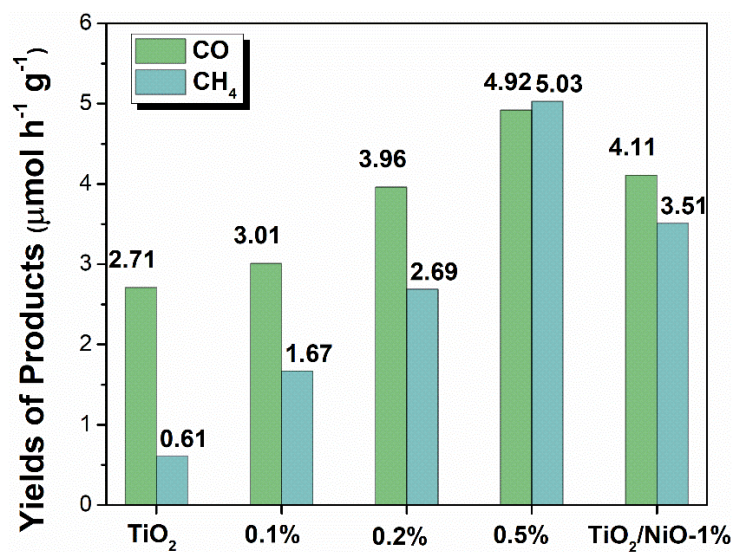

**Fig. S2** Photocatalytic CO<sub>2</sub> reduction performance over TiO<sub>2</sub>/NiO composites with different loading ratios of NiO.

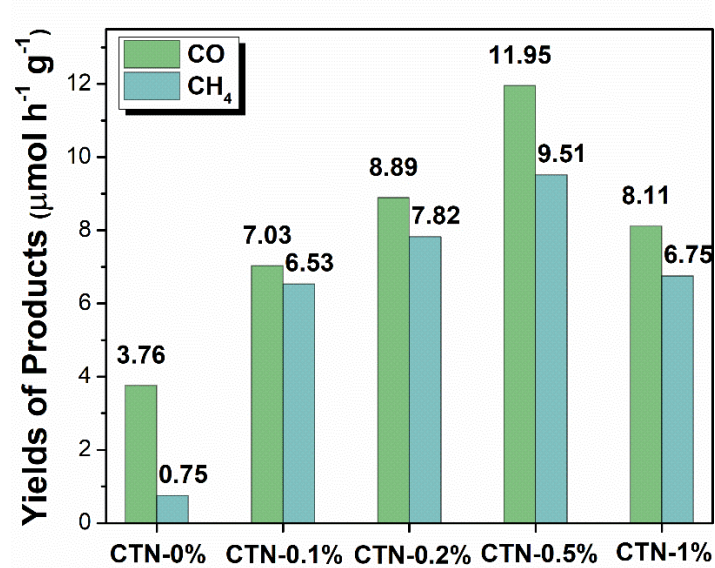

**Fig. S3** Photocatalytic CO<sub>2</sub> reduction performance over CTN composites with different loading

ratios of NiO.

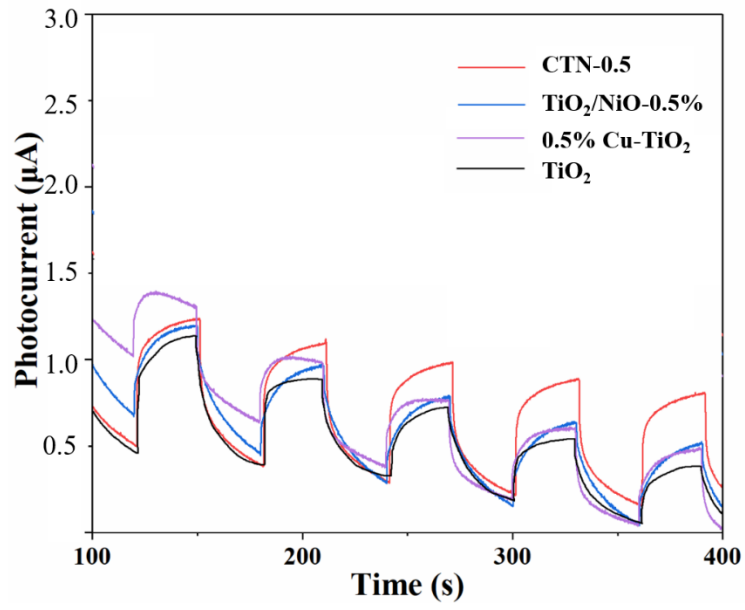

**Fig. S4** Photocurrent behavior for prepared TiO<sub>2</sub>, 0.5% Cu-TiO<sub>2</sub>, TiO<sub>2</sub>/NiO-0.5% and CTN-0.5.

**Tab. S1** Photocatalysts published in recent work used to photoreduction CO<sub>2</sub> to CH<sub>4</sub> performance.

| Photocatalysts                                    | Light source  |                           | Reaction solution                                                                      | CO yields (μmol h <sup>-1</sup> g <sup>-1</sup> ) | CH <sub>4</sub> yields (μmol h <sup>-1</sup> g <sup>-1</sup> ) | AQE (%)      |
|---------------------------------------------------|---------------|---------------------------|----------------------------------------------------------------------------------------|---------------------------------------------------|----------------------------------------------------------------|--------------|
|                                                   | 420 nm        | 300 W Xe lamp             |                                                                                        |                                                   |                                                                |              |
| <b>This work</b>                                  | <b>420 nm</b> | <b>300 W Xe lamp</b>      | <b>water</b>                                                                           | <b>11.85</b>                                      | <b>9.51</b>                                                    | <b>0.64%</b> |
| AuCu-TiO <sub>2</sub> <sup>1</sup>                | —             | 300 W Xe lamp             | water                                                                                  | 4.98                                              | 22.47                                                          | —            |
| Cu <sub>2</sub> O/Ni-MOF <sup>2</sup>             | —             | 300 W Xe lamp             | water                                                                                  | 21.7                                              | —                                                              | —            |
| Cu-Ni@CN <sup>3</sup>                             | 420 nm        | 300W Xe lamp              | water                                                                                  | —                                                 | 75.2                                                           | 0.82%        |
| Cu <sub>2</sub> O/Ni-MOF <sup>4</sup>             | —             | 300W Xe lamp              | water                                                                                  | 21.7                                              | —                                                              | —            |
| Ni/TiO <sub>2</sub> -OV <sub>2</sub> <sup>5</sup> | —             | 300W Xe lamp (λ > 420 nm) | water                                                                                  | 22.56                                             | 3.93                                                           | —            |
| Cu/TiO <sub>2</sub> <sup>6</sup>                  | —             | 300W Xe lamp              | water                                                                                  | 15.27                                             | 0.98                                                           | —            |
| MOF-808-CuNi <sup>7</sup>                         | 420 nm        | 300W Xe lamp              | [Ru(bpy) <sub>3</sub> ] Cl <sub>2</sub> ·6H <sub>2</sub> O<br>20% TEOA<br>acetonitrile | 2.3                                               | 158.7                                                          | 2.31         |

### References

1. D. Jiang, Y. Zhou, Q. Zhang, Q. Song, C. Zhou, X. Shi and D. Li, *ACS Appl. Mater. Interfaces*, 2021, 13, 46772-46782.
2. H. Jiang, M. Xu, X. Zhao, H. Wang and P. Huo, *J. Environ. Chem. Eng.*, 2023, 11, 109504.
3. D. E. Lee, S. Moru, R. Bhosale, W. K. Jo and S. Tonda, *Appl. Surf. Sci.*, 2022, 599, 153973.
4. H. Jiang, M. Xu, X. Zhao, H. Wang and P. Huo, *J. Environ. Chem. Eng.*, 2023, 11, 109504.
5. Z. Li, W. Bai, D. Liu, B. Han, Y. Liang and J. Qi, *Sep. Purif. Technol.*, 2024, 330, 125250.
6. K. Zhu, Q. Zhu, M. Jiang, Y. Zhang, Z. Shao, Z. Geng, X. Wang, H. Zeng, X. Wu, W. Zhang, K. Huang and S. Feng, *Angew. Chem. Int. Ed.*, 2022, 61, e202207600.
7. J. Li, H. Huang, W. Xue, K. Sun, X. Song, C. Wu, L. Nie, Y. Li, C. Liu, Y. Pan, H. Jiang, D. Mei and C. Zhong, *Nat. Catal.*, 2021, 4, 719-729.
